# Supplementary material for: OsCERK1 Contributes to Cupric Oxide Nanoparticles Induced Phytotoxicity and Basal Resistance against Blast by Regulating the Anti-Oxidant System in Rice
Source: MDPI journal article supplement (doi:10.3390/jof9010036), 2022-12-26
Supplement: s1 [file s1]

| Supplemental Table S1 Primers used in this work |              |                                   |
|-------------------------------------------------|--------------|-----------------------------------|
| used for                                        | primer names | primer sequences (from 5'- to 3') |
| Real-time<br>quantitative<br>PCR                | qOsCERK1-F   | GCCTCCAGAGTATGCTCGAT              |
|                                                 | qOsCERK1-R   | GAGGGCCTCCTCAAACAGAT              |
|                                                 | qOsUBQ-F     | AAGAAGCTGAAGCATCCAGC              |
|                                                 | qOsUBQ-R     | CCAGGACAAGATGATCTGCC              |
|                                                 | qOsPAL1-F    | CTACCCGCTGATGAAGAAGC              |
|                                                 | qOsPAL1-R    | GAACCTTGTTTCAGCTCCTCG             |
|                                                 | qOsNAC4-F    | TCCTGCCACCATTCTGAGATG             |
|                                                 | qOsNAC4-R    | TTGCAGAATCATGCTTGCCAG             |
